# Supplementary material for: Splicing factor SRSF1 promotes breast cancer progression via oncogenic splice switching of PTPMT1
Source: PubMed Central journal article supplement (PMC8122567; doi:10.1186/s13046-021-01978-8), 2021-05-15

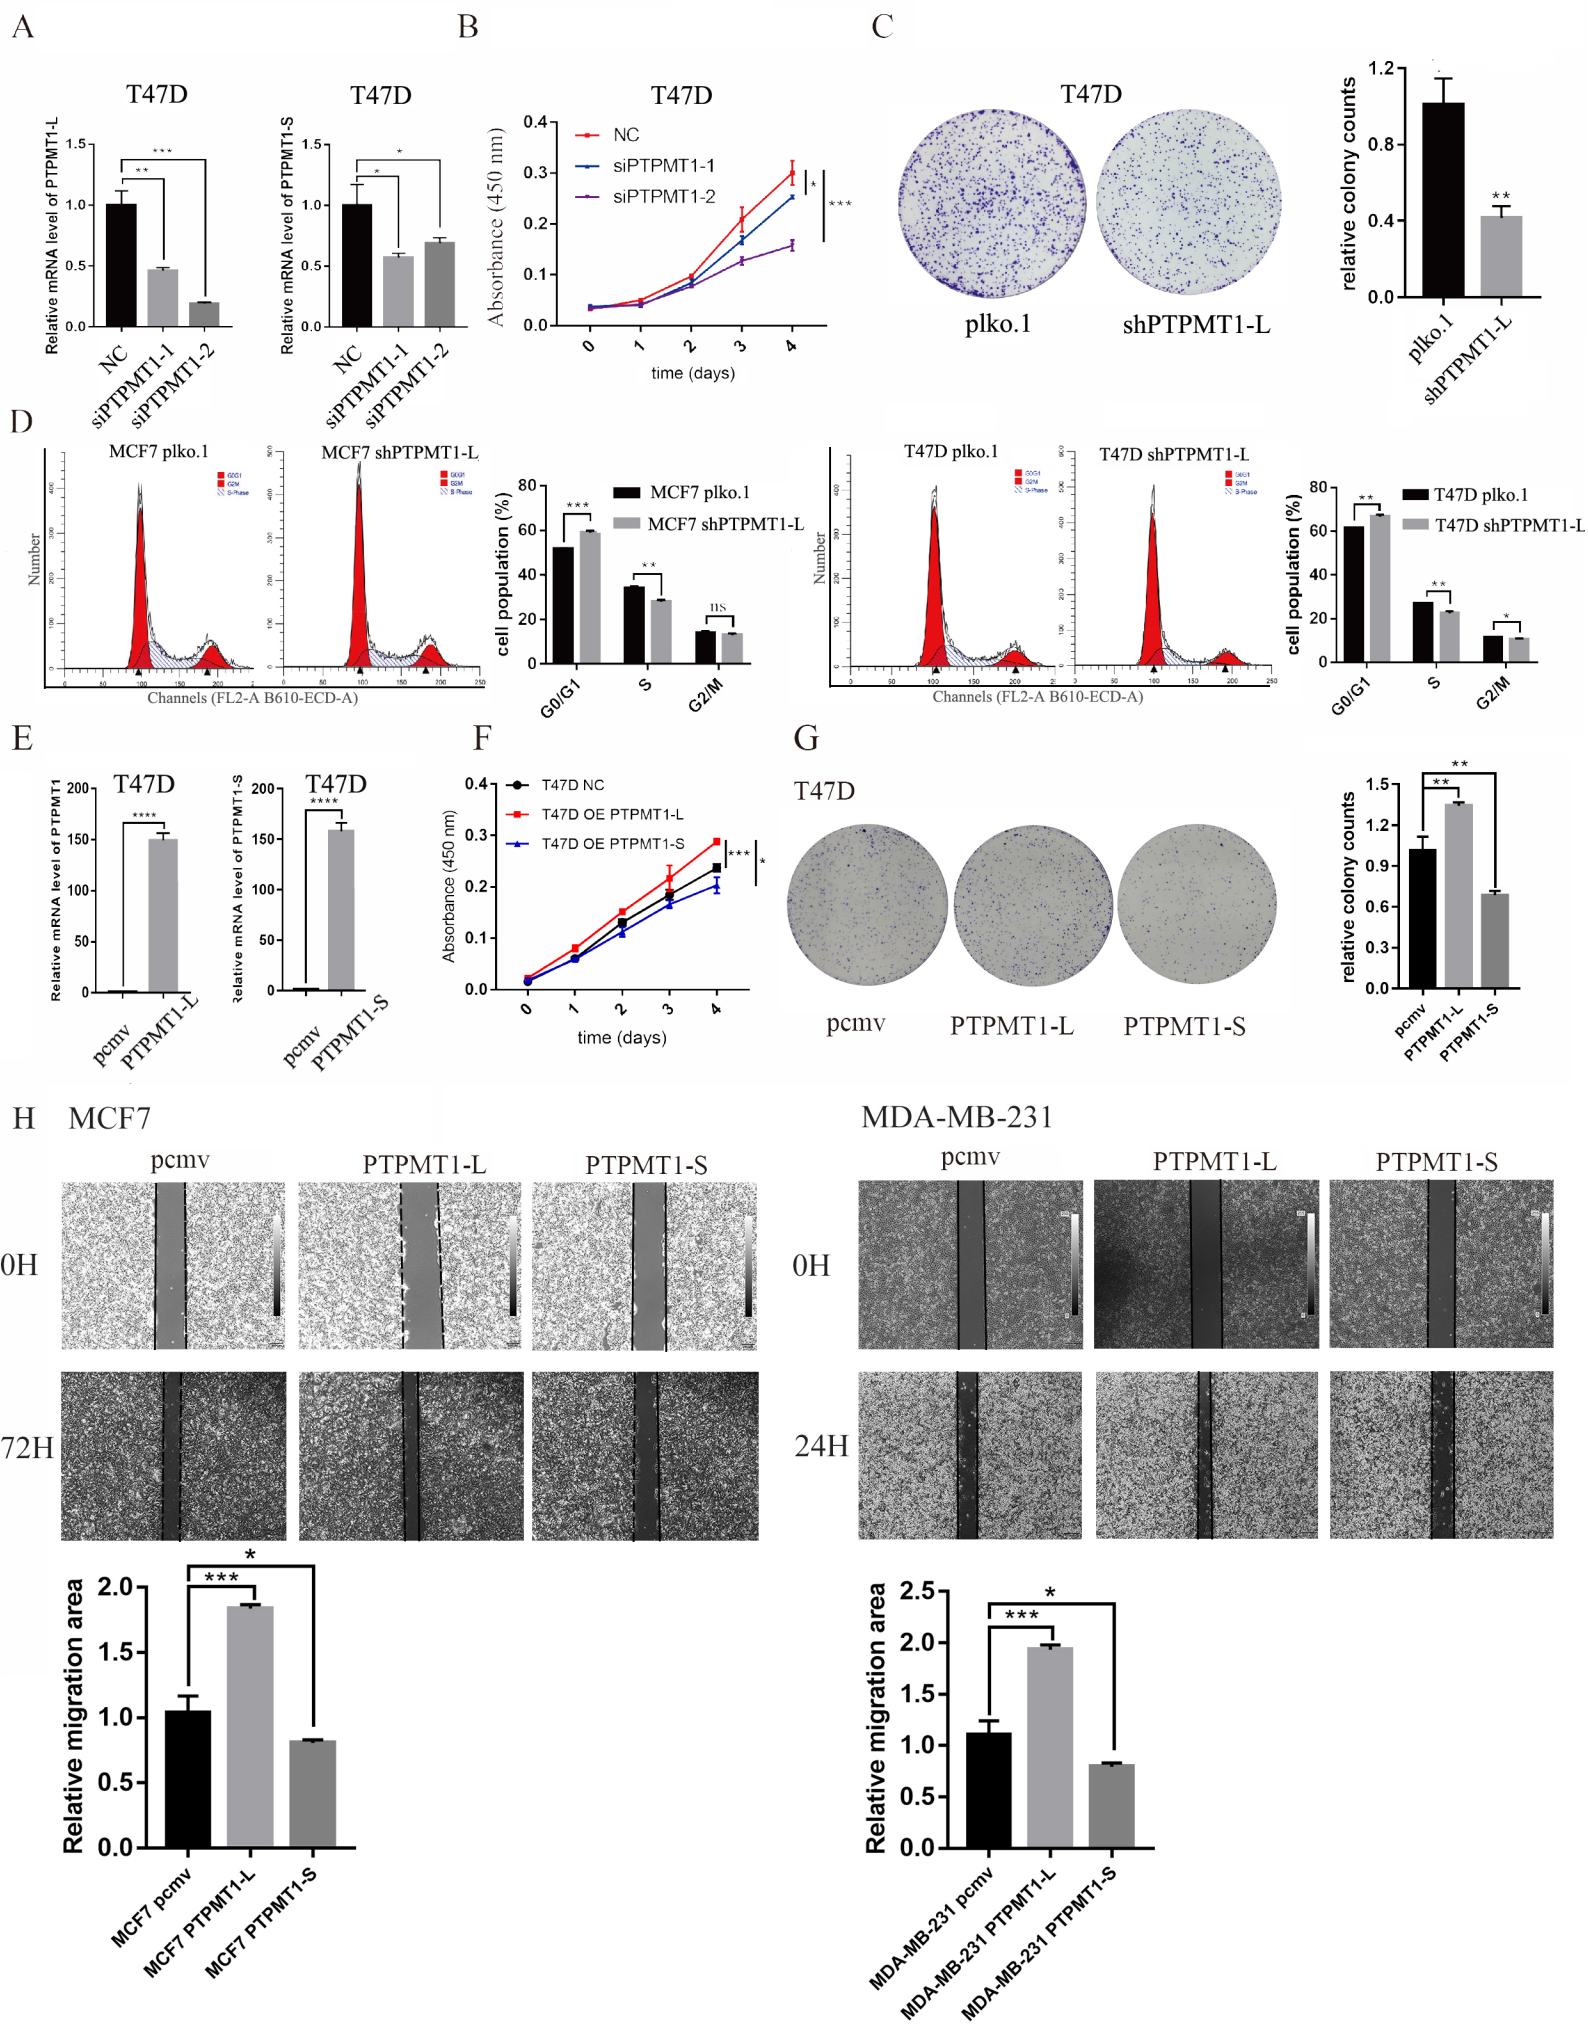

Supplement: 13046_2021_1978_MOESM3_ESM.pdf [file 13046_2021_1978_MOESM3_ESM.pdf]
